# Supplementary material
Source: PubMed Central journal article supplement (PMC4495219)
Supplement: AEM.00828-15_zam999116430so1.pdf [file AEM.00828-15_zam999116430so1.pdf]

## SUPPLEMENTAL MATERIAL

### Whole-genome Sequence Analysis and Genome-wide Virulence Gene

#### Identification of *Riemerella anatipestifer* Strain Yb2

Xiaolan Wang<sup>a</sup>, Chan Ding<sup>a</sup>, Shaohui Wang<sup>a</sup>, Xianghan Han<sup>a</sup>, Shengqing Yu<sup>a,#</sup>

Shanghai Veterinary Research Institute, Chinese Academy of Agricultural Sciences

(CAAS), Shanghai, P. R. China<sup>a</sup>.

**TABLE S1** Strains, plasmids and primers used in this study

| Strains,<br>plasmids<br>or<br>primers | Characteristics                                                                                                    | Source<br>or<br>reference |
|---------------------------------------|--------------------------------------------------------------------------------------------------------------------|---------------------------|
| Yb2                                   | <i>Riemerella anatipestifer</i> serotype 2 strain, virulent isolate, Kanamycin resistant                           | 1                         |
| BW19851                               | <i>Escherichia coli</i> , plasmid pEP4351 in BW19851, chloramphenicol resistant                                    | 2                         |
| pEP4351                               | pir-requiring R6K oriV, RP4 oriT, Cm <sup>r</sup> Tc <sup>r</sup> (Em <sup>r</sup> ),vector for Tn4351 mutagenesis | 2                         |
| Primers                               |                                                                                                                    |                           |
| RA<br>rRNA-F                          | 16S 5' GAGCGGTAGAGTATCTTCGGATACT3'                                                                                 | This study                |
| RA<br>rRNA-R                          | 16S 5' AATTCCTTTGAGTTTCAACCTTGCG3'                                                                                 | This study                |
| Erm-F                                 | 5' GCCCGAAATGTTCAAGTTGT 3'                                                                                         | 3                         |
| Erm-R                                 | 5' CTTGACAACCCGACTTT 3'                                                                                            | 3                         |
| Tn4351-F                              | 5' TGGCACCTTTGTGGTTCTTAC 3'                                                                                        | 3                         |
| Tn4351-F                              | 5' GAGAGACAATGTCCCCCTTTC 3'                                                                                        | 3                         |
| SP1                                   | 5' CTCCCAGAAAATTTCCAAGACTCTCA 3'                                                                                   | 2                         |
| SP2                                   | 5' TAAAGTGCTGACCCGTAACGAAC 3'                                                                                      | 2                         |
| SP3                                   | 5' GTGGTAGCTATAGCATGGAGCTTGC 3'                                                                                    | 2                         |
| 340                                   | 5' GACTTGGATACCTCACGCC 3'                                                                                          | 4                         |
| 341                                   | 5' TTGGAAATTTTCTGGGAGG 3'                                                                                          | 4                         |
| TN-1                                  | 5' GGACCTACCTCATAGACAA 3'                                                                                          | 4                         |
| IS4351-F                              | 5' TCAGAGTGAGAGAAAGG 3'                                                                                            | 4                         |

**TABLE S2** Summary of *Riemerella anatipestifer* Yb2 gene prediction

| Features                       | Genome    |
|--------------------------------|-----------|
| Total size, bp                 | 2,184,066 |
| Coding region size (bp)        | 1,984,800 |
| Code percent (%)               | 90.88     |
| GC content of coding region, % | 35.73     |
| Gene numbers                   | 2,073     |
| Average gene length (bp)       | 976       |
| ORFs                           | 2,021     |
| Pseudo genes                   | 7         |
| CRISPR Arrays                  | 1         |
| rRNA operons                   | 6         |
| tRNAs                          | 38        |
| Other ncRNA                    | 1         |
| Fameshifted genes              | 3         |

**TABLE S3** Numbers of gene associated with the general COG functional categories

| Code | Genes | Percent (%) | Description <sup>a</sup>                                      |
|------|-------|-------------|---------------------------------------------------------------|
| A    | 0     | 0.0         | RNA processing and modification                               |
| B    | 0     | 0.0         | Chromatin structure and dynamics                              |
| C    | 80    | 6.59        | Energy production and conversion                              |
| D    | 17    | 1.40        | Cell cycle control, cell division, chromosome partitioning    |
| E    | 102   | 8.40        | Amino acid transport and metabolism                           |
| F    | 48    | 3.95        | Nucleotide transport and metabolism                           |
| G    | 38    | 3.13        | Carbohydrate transport and metabolism                         |
| H    | 75    | 6.18        | Coenzyme transport and metabolism                             |
| I    | 47    | 3.87        | Lipid transport and metabolism                                |
| J    | 127   | 10.46       | Translation, ribosomal structure and biogenesis               |
| K    | 52    | 4.28        | Transcription                                                 |
| L    | 82    | 6.75        | Replication, recombination and repair                         |
| M    | 119   | 9.80        | Cell wall/membrane/envelope biogenesis                        |
| N    | 3     | 0.25        | Cell motility                                                 |
| O    | 64    | 5.27        | Posttranslational modification, protein turnover, chaperones  |
| P    | 67    | 5.51        | Inorganic ion transport and metabolism                        |
| Q    | 21    | 1.73        | Secondary metabolites biosynthesis, transport and catabolism  |
| R    | 140   | 11.53       | General function prediction only                              |
| S    | 70    | 5.77        | Function unknown                                              |
| T    | 24    | 1.98        | Signal transduction mechanisms                                |
| U    | 18    | 1.48        | Intracellular trafficking, secretion, and vesicular transport |
| V    | 20    | 1.65        | Defense mechanisms                                            |
| W    | 0     | 0.0         | Extracellular structures                                      |
| Y    | 0     | 0.0         | Nuclear structure                                             |
| Z    | 0     | 0.0         | Cytoskeleton                                                  |
| _    | 807   | 38.92       | No related COGs                                               |

<sup>a</sup>Functional characterization of the proteins was predicted by searching against eggNOG (Version 3) database using BLASTP.

**TABLE S4** Overview of the genomic islands in *Riemerella anatipestifer* Yb2

| No.               | CDS                                     | Characteristics or putative functions                                                                                                                                                                                                                                                                                                                                                                              |
|-------------------|-----------------------------------------|--------------------------------------------------------------------------------------------------------------------------------------------------------------------------------------------------------------------------------------------------------------------------------------------------------------------------------------------------------------------------------------------------------------------|
| GI-1 <sup>a</sup> | <i>AS87_03450-</i><br><i>AS87_03580</i> | hypothetical protein, N-acetylmuramoyl-L-alanine amidase, phage head protein, aminopeptidase, head morphogenesis protein, DNA-binding protein                                                                                                                                                                                                                                                                      |
| GI-2              | <i>AS87_05965-</i><br><i>AS87_06030</i> | integrase, restriction endonuclease, ATPase AAA, transcriptional regulator, hypothetical protein                                                                                                                                                                                                                                                                                                                   |
| GI-3              | <i>AS87_08275-</i><br><i>AS87_08285</i> | hypothetical protein                                                                                                                                                                                                                                                                                                                                                                                               |
| GI-4              | <i>AS87_08505-</i><br><i>AS87_08565</i> | peptidase M23, serine/threonine protein kinase, transposase, ATPase AAA, membrane protein, hypothetical protein                                                                                                                                                                                                                                                                                                    |
| GI-5              | <i>AS87_09220-</i><br><i>AS87_09230</i> | DNA-binding protein, restriction endonuclease, hypothetical protein                                                                                                                                                                                                                                                                                                                                                |
| GI-6              | <i>AS87_09605-</i><br><i>AS87_09920</i> | antibiotic activity (LinF, chloramphenicol acetyltransferase, tetracycline resistance protein); transporters (mercury transporter, cation transporter, heavy metal transporter); transcriptional regulator (AraC, XRE); toxin (RelE, YoeB); multicopper oxidase, polymerase, restriction endonuclease MboI, DNA methylase, membrane protein, twitching motility protein PilT, prevent-host-death protein, esterase |

<sup>a</sup>Genomic islands (GIs) were detected by IslandViewer, and a total of six GIs were predicted.

**TABLE S5** Single-nucleotide polymorphisms (SNPs) between *Riemerella anatipestifer* Yb2 and other reference strains DSM 15868, RA-GD, RA-CH-1 and RA-CH-2

|     |       | DSM 15868        |       |       |  |
|-----|-------|------------------|-------|-------|--|
| Yb2 | A     | C                | G     | T     |  |
| A   |       | 317 <sup>a</sup> | 2276  | 545   |  |
| C   | 294   |                  | 125   | 2330  |  |
| G   | 2366  | 122              |       | 328   |  |
| T   | 521   | 2298             | 382   |       |  |
|     |       | RA-GD            |       |       |  |
| Yb2 | A     | C                | G     | T     |  |
| A   |       | 153              | 850   | 200   |  |
| C   | 137   |                  | 45    | 877   |  |
| G   | 899   | 48               |       | 123   |  |
| T   | 210   | 880              | 126   |       |  |
|     |       | RA-CH-1          |       |       |  |
| Yb2 | A     | C                | G     | T     |  |
| A   |       | 2057             | 14834 | 3537  |  |
| C   | 2273  |                  | 742   | 15541 |  |
| G   | 15419 | 780              |       | 2307  |  |
| T   | 3511  | 15000            | 2131  |       |  |
|     |       | RA-CH-2          |       |       |  |
| Yb2 | A     | C                | G     | T     |  |
| A   |       | 187              | 1059  | 290   |  |
| C   | 219   |                  | 100   | 997   |  |
| G   | 1028  | 85               |       | 189   |  |
| T   | 256   | 972              | 166   |       |  |

<sup>a</sup>Genomic sequences with adjusted start position were submitted to NUCmer system (NUCleotide MUMmer Version 3.07) for alignment, and non-specific records were filtered by Delta-filter. After alignment of sequenced reads to a reference genome, SNP calling was performed using the Show-snps software.

## REFERENCES

1. **Hu Q, Zhang Z, Miao J, Liu Y, Liu X, S D.** 2001. The Epidemiology study of *Riemerella anatipestifer* infection in Jiangsu and Anhui provinces. Chinese Journal of Veterinary Science and Technology **31**:12-13.
2. **Hu Q, Zhu Y, Tu J, Yin Y, Wang X, Han X, Ding C, Zhang B, Yu S.** 2012. Identification of the genes involved in *Riemerella anatipestifer* biofilm formation by random transposon mutagenesis. PloS one **7**:e39805.
3. **Wang X, Ding C, Wang S, Han X, Hou W, Yue J, Zou J, Yu S.** 2014. The AS87\_04050 gene is involved in bacterial lipopolysaccharide biosynthesis and pathogenicity of *Riemerella anatipestifer*. PloS one **9**:e109962.
4. **Álvarez B, Secades P, Prieto M, McBride M, Guijarro J.** 2006. A mutation in *Flavobacterium psychrophilum tlpB* inhibits gliding motility and induces biofilm formation. Appl Environ Microbiol **72**:4044-4053.
